# Supplementary material for: S100A9-Driven Amyloid-Neuroinflammatory Cascade in Traumatic Brain Injury as a Precursor State for Alzheimer’s Disease
Source: PubMed Central journal article supplement (PMC6110751; doi:10.1038/s41598-018-31141-x), 2018-08-27
Supplement: 41598_2018_31141_MOESM1_ESM.pdf [file 41598_2018_31141_MOESM1_ESM.pdf]

## Supplementary Information

### S100A9-Driven Amyloid-Neuroinflammatory Cascade

#### in Traumatic Brain Injury as a Precursor State for Alzheimer's Disease

Chao Wang<sup>1,§</sup>, Igor A. Iashchishyn<sup>1,2,§</sup>, Jonathan Pansieri<sup>1</sup>, Sofie Nyström<sup>3</sup>, Oxana Klementieva<sup>4</sup>, John Kara<sup>1</sup>, Istvan Horvath<sup>1</sup>, Roman Moskalenko<sup>1,5</sup>, Reza Rofougaran<sup>1</sup>, Gunnar Gouras<sup>4</sup>, Gabor G. Kovacs<sup>6</sup>, S.K. Shankar<sup>7</sup>, Ludmilla A. Morozova-Roche<sup>1</sup>

<sup>1</sup>Department of Medical Biochemistry and Biophysics, Umeå University, 90187 Umeå, Sweden

<sup>2</sup>Department of General Chemistry, Sumy State University, Sumy 40000, Ukraine

<sup>3</sup>IFM-Department of Chemistry, Linköping University, Linköping, Sweden

<sup>4</sup>Department of Experimental Medical Sciences, Lund University, Lund, Sweden

<sup>5</sup>Department of Pathology, Sumy State University, Sumy 40000, Ukraine

<sup>6</sup>Institute of Neurology, Medical University of Vienna, Vienna, Austria

<sup>7</sup>Human Brain Tissue Repository, Department of Neuropathology, National Institute of Mental Health and Neurosciences, 560029 Bangalore, India

<sup>§</sup>First authors with equal contribution

Correspondence and request for materials should be addressed to C.W. (email: [chao.wang@wustl.edu](mailto:chao.wang@wustl.edu)) or

L.A.M-R (email: [Ludmilla.Morozova-Roche@umu.se](mailto:Ludmilla.Morozova-Roche@umu.se))

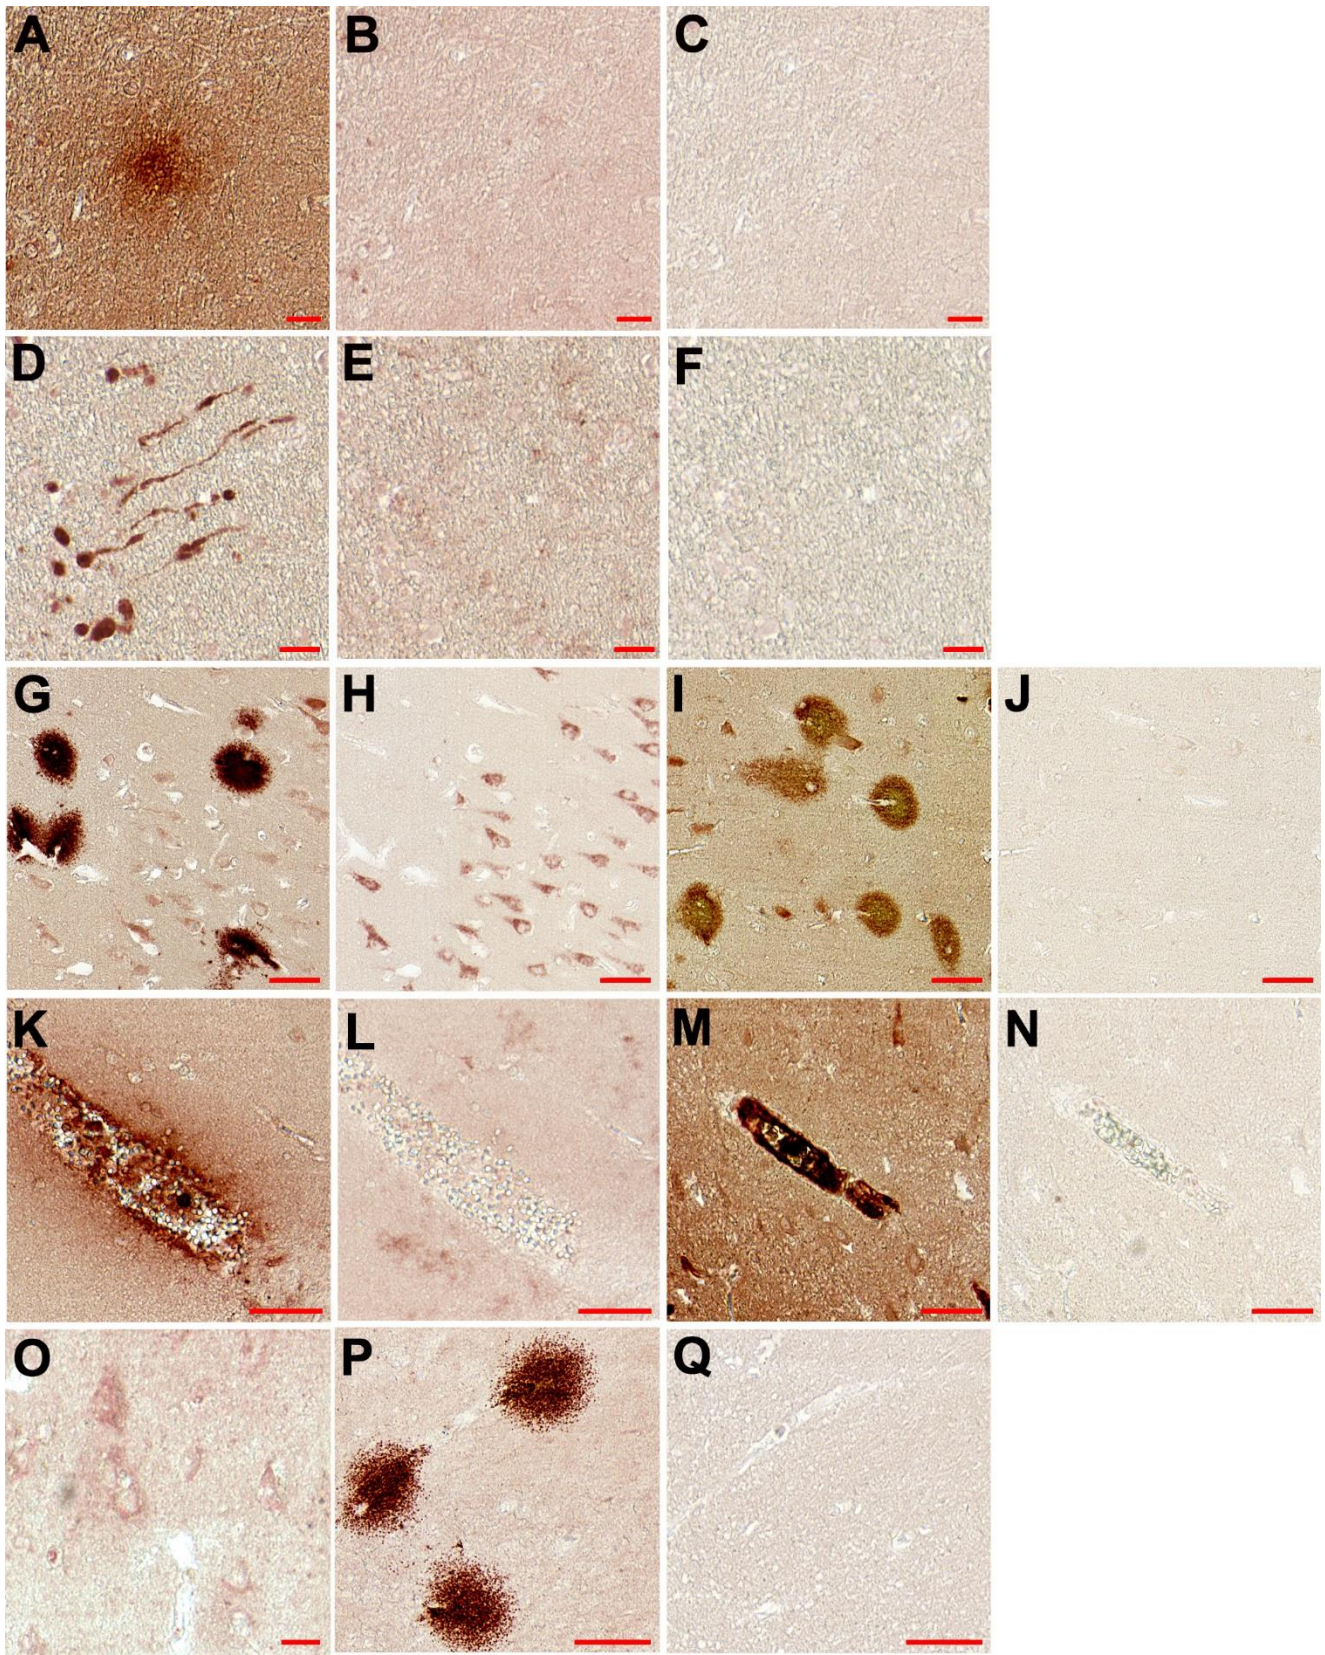

**Supplementary Fig. S1.** S100A9 and A $\beta$  in Human TBI Hippocampi. Sequential immunohistochemistry of a representative proteinaceous precursor-plaque with (A) A $\beta$ , (B) amyloid oligomer specific A11 and (C) fibril specific OC antibodies, respectively (ca. 1 day post-TBI time). Sequential immunohistochemistry of neuronal cells with (D) A $\beta$ , (E) amyloid oligomer specific A11 and (F) fibril specific OC antibodies, respectively (ca. 1 day post-TBI time). Pair of sequential immunohistochemistry images with (G) S100A9 and (H) A11 antibodies of TBI tissues (ca. 1 day post-TBI time) indicating that the precursor-plaques were reactive with S100A9 but not with A11 antibodies, while S100A9 immunopositive cells were stained also with A11 antibodies. Pair of sequential immunohistochemistry images with (I) S100A9 and (J) fibril specific OC antibodies of TBI tissues (ca. 1 day post-TBI time), indicating that the S100A9 immunopositive precursor-plaques were not reactive with OC antibodies. Pairs of sequential immunohistochemistry images of blood vessel in TBI tissues (ca. 1 day post-TBI time) with (K) S100A9–(L) A11 antibodies and (M) S100A9–(N) fibril specific OC antibodies, respectively. (O) Part of sequential immunohistochemistry procedure with S100A9 antibodies complementary to the image of A $\beta$  immunopositive precursor-plaques in Figure 1B, indicating the lack of immunoreactivity of these plaques with S100A9 antibodies. Pair of sequential immunohistochemistry images of precursor-plaques in TBI brain tissues (ca. 1 day post-TBI) with (P) S100A9 and (Q) A $\beta$  antibodies, respectively, indicating that the S100A9 positive precursor-plaques were not reactive with A $\beta$  antibodies. Scale bars are 20  $\mu$ m (A–F and O) and 50  $\mu$ m in (G–N, P and Q).

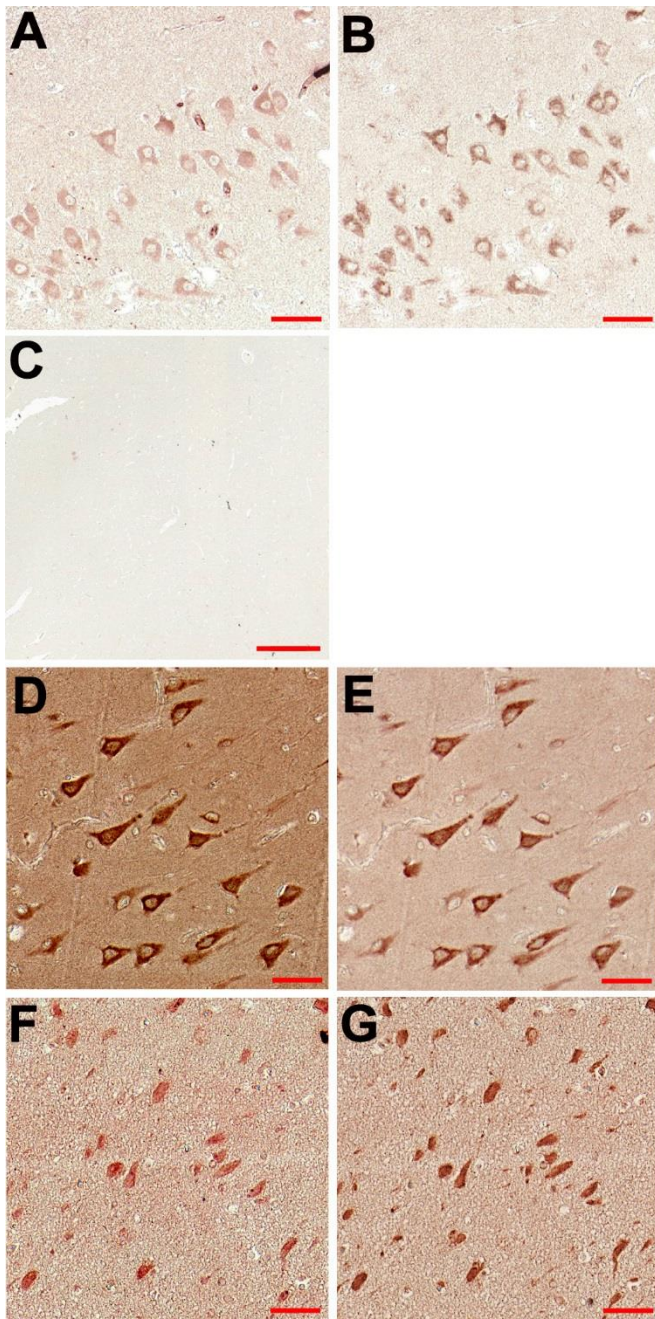

**Supplementary Fig. S2.** Intracellular S100A9/A $\beta$  aggregation and apoptosis in human TBI hippocampi. Parts of sequential immunohistochemistry of neuronal cells in the TBI hippocampus with (A) S100A9 and (B) A11 antibodies, respectively, which are complementary to the A $\beta$ -positive immunostaining (Figure 2K) (C) Representative image of double immunohistochemistry with S100A9 and A $\beta$  antibodies of the hippocampus tissues in control non-demented patient, showing lack of immunostaining. Parts of sequential immunohistochemistry of neuronal cells in the TBI hippocampus with (D) S100A9 and (E) A11 antibodies,

respectively, which are complementary to the Bax-positive immunostaining (Figure 2L). (F and G) Parts of sequential immunohistochemistry of neuronal cells with (F) S100A9 and (G) A11 antibodies, respectively, which are complementary to the immunostaining with activated caspase-3 antibodies (Figure 2M). Scale bars are 50  $\mu\text{m}$  (A, B, D–G) and 500  $\mu\text{m}$  (C).

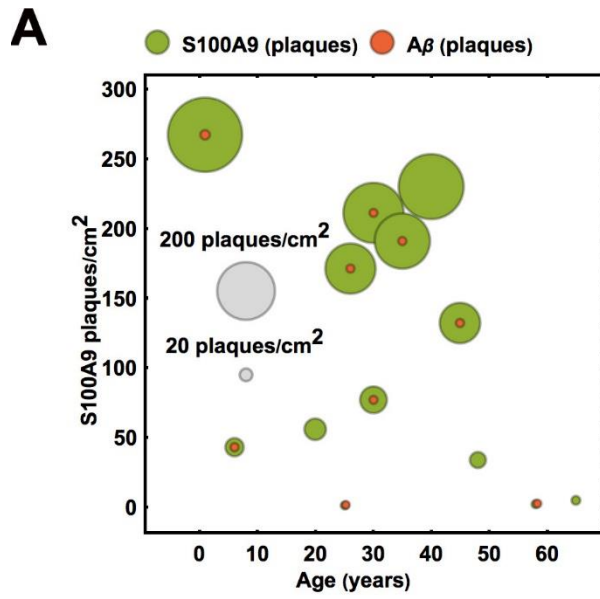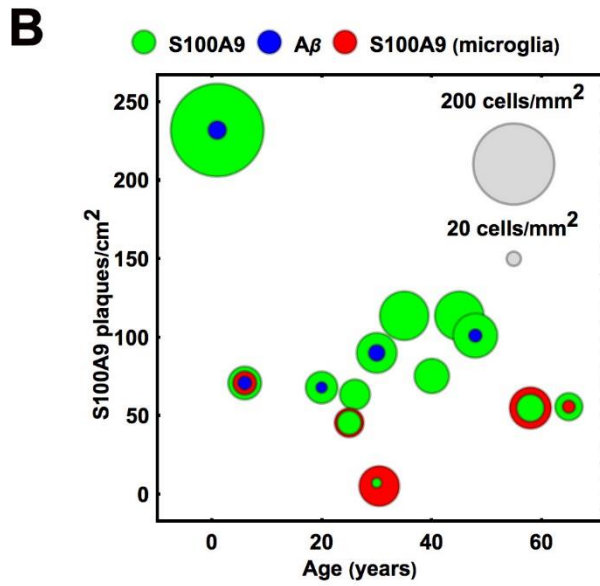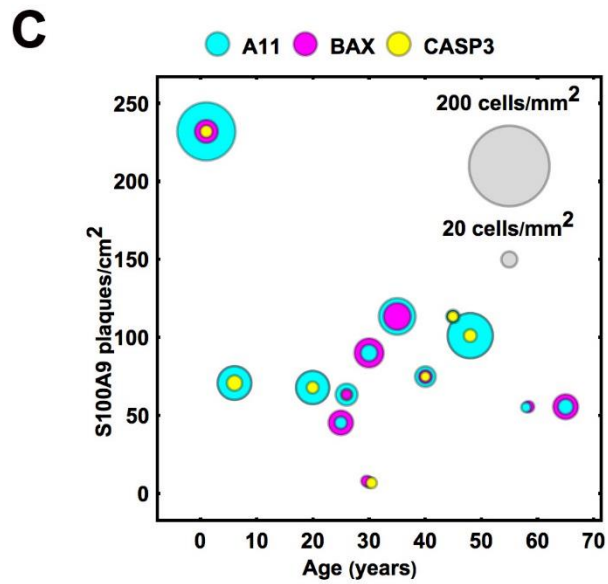

**Supplementary Fig. S3.** Effect of age on TBI amyloid, neuroinflammatory and apoptotic responses. n=13 TBI patients. Bubble charts showing counts of (A) the precursor-plaques reactive with S100A9 and A $\beta$  antibodies, (B) neuronal and microglial cells reactive with S100A9 and A $\beta$  antibodies and (C) neuronal cells reactive with A11, Bax and activated caspase-3 antibodies, respectively, depending on the subject age. Each bubble corresponds to individual subject.

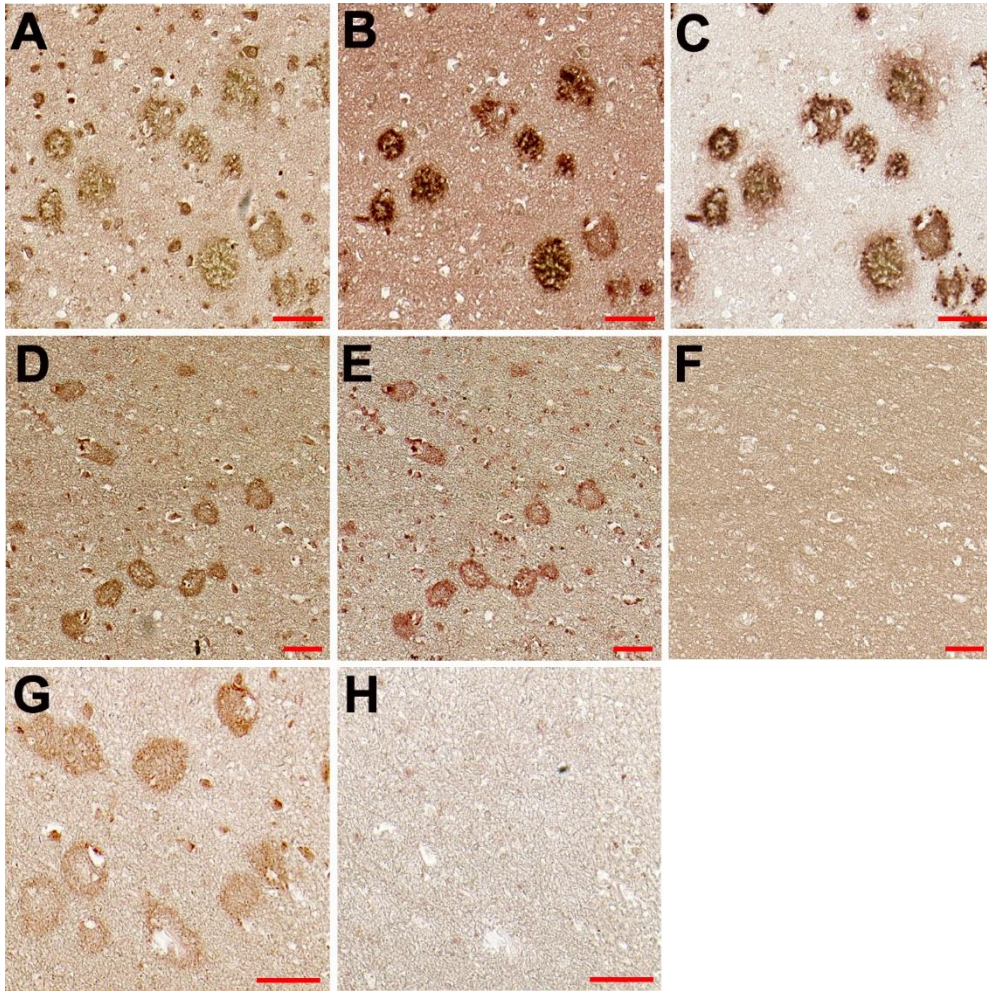

**Supplementary Fig. S4.** S100A9 and A $\beta$  plaques in human brain tissues with Alzheimer's disease. Senile plaques stained with sequence of (A) S100A9, (B) A $\beta$  and (C) OC antibodies. S100A9 plaques stained with sequence of (D) S100A9, (E) A11 and (F) A $\beta$  antibodies. S100A9 plaques stained with sequence of (G) S100A9 and (H) OC antibodies. Scale bars are 50  $\mu$ m in (A–H).



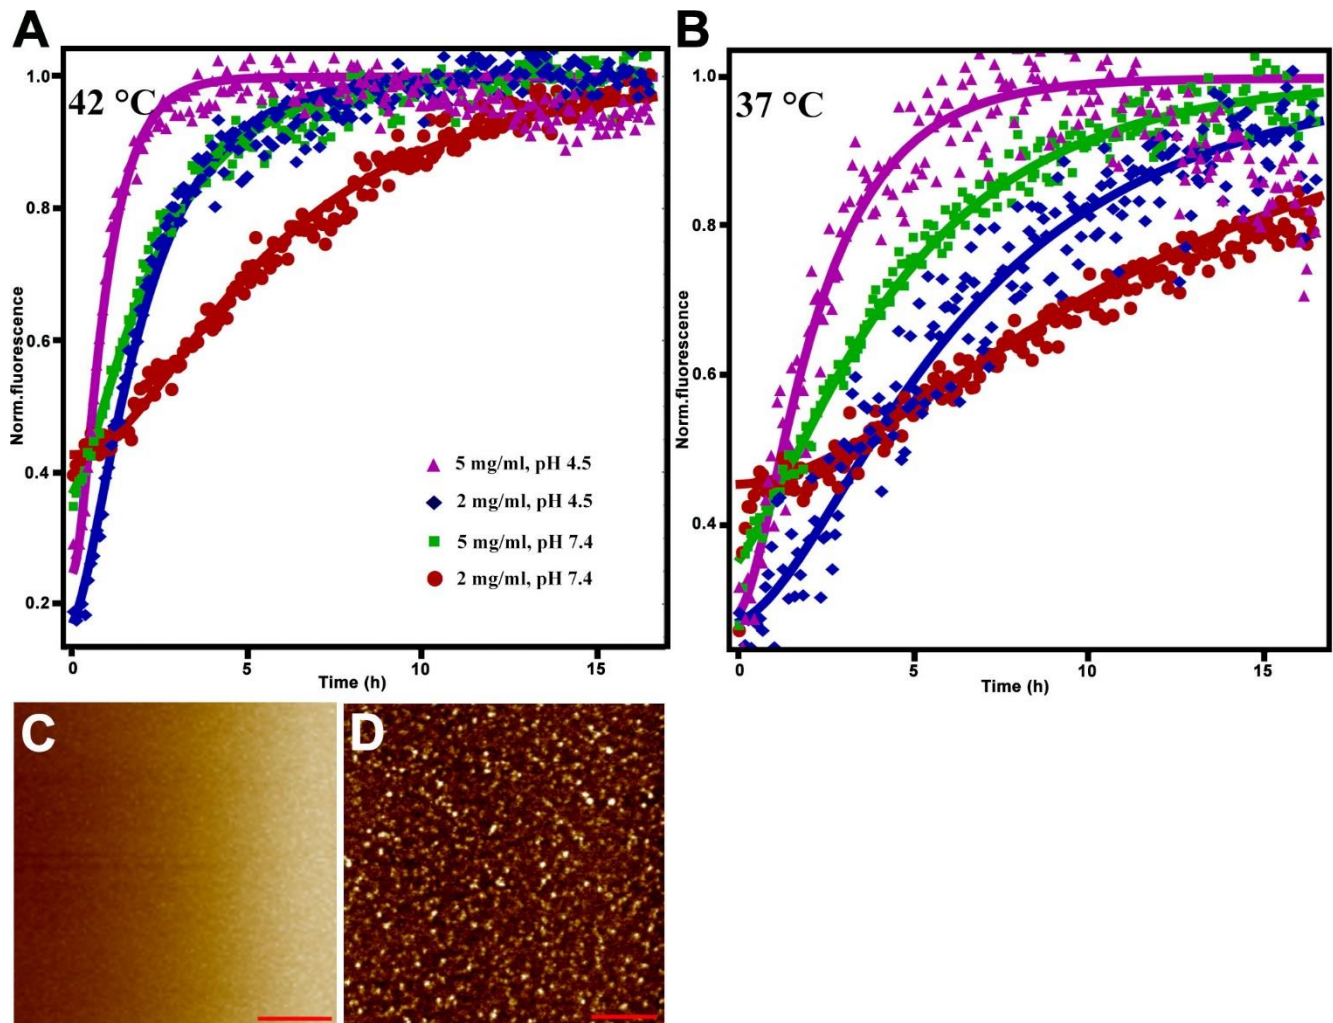

**Supplementary Fig. S5.** *In vitro* S100A9 amyloid formation and proteinase K digestion. (A and B) Normalized kinetics of S100A9 amyloid formation monitored by h-FTAA fluorescence at (A) 42 °C and (B) 37 °C under shaking with glass beads. S100A9 amyloid kinetics in 10 mM PBS, pH 7.4, 2 mg/ml is shown in red and at 5 mg/ml – in green; amyloid kinetics in 20 mM sodium acetate, pH 4.5, 2 mg/ml is shown in blue and at 5 mg/ml – in magenta. (C) AFM height images of S100A9 amyloids (5 mg/ml) subjected to 72 h treatment with proteinase K at pH 7.4, 37 °C and (D) – at pH 4.5, 42 °C. Scale bars are 2  $\mu\text{m}$  in (C) and 200 nm in (D).

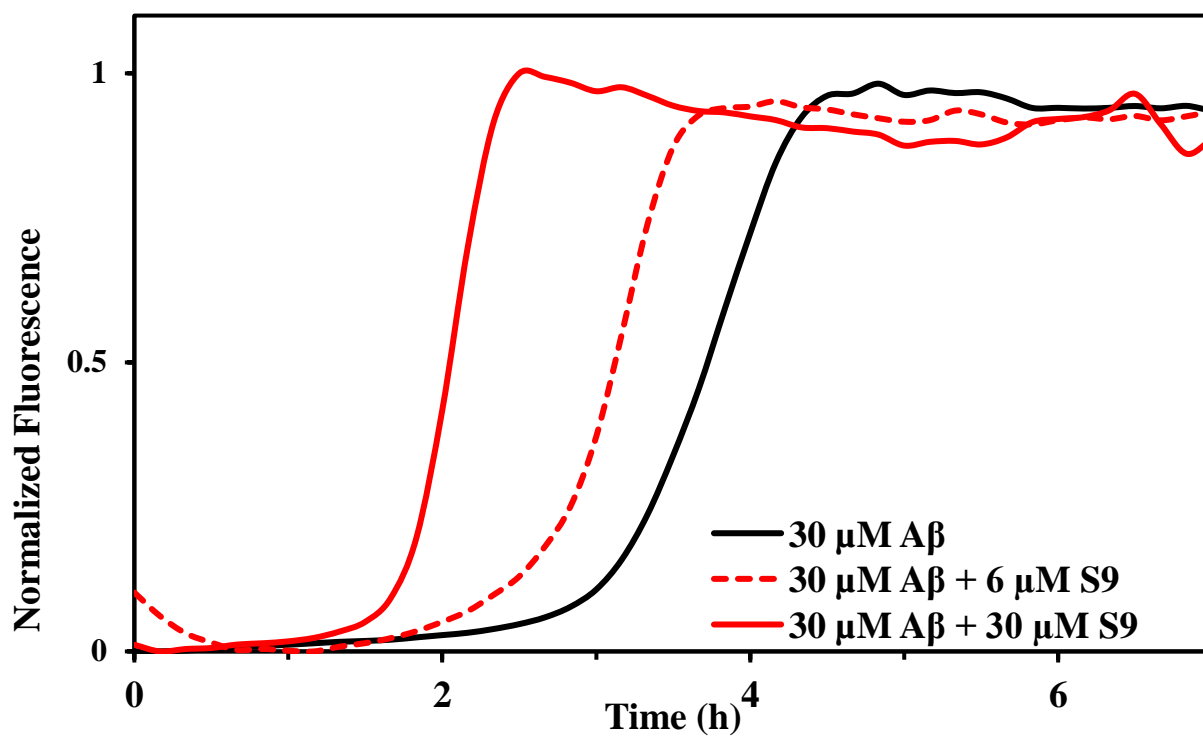

**Supplementary Fig. S6.** Effect of S100A9 fibrillar sample on A $\beta_{42}$  amyloid formation kinetics monitored by thioflavin-T fluorescence assay. Concentrations of A $\beta_{42}$  and S100A9 samples are indicated in caption.

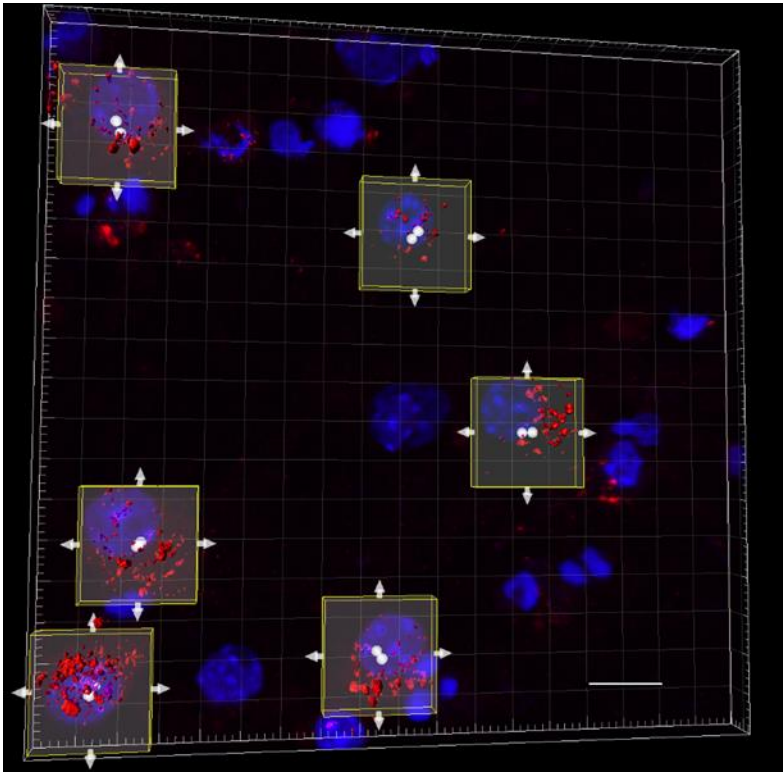

**Supplementary Fig. S7.** Representative confocal microscopy image of wild-type mouse neurons expressing S100A9 (shown by red immunofluorescence) induced by addition of A $\beta$ <sub>42</sub> oligomers. DAPI nuclei staining shown in blue. S100A9-specific immunofluorescence signal per cell was quantified by using an Imaris (Bitplane) software. Two-dimensional cell images obtained by confocal microscopy were reconstructed by an Imaris into three-dimensional volumetric data sets and the volumetric data, reflecting S100A9, rendered iso-surfaces used for quantification. Scale bar is 10  $\mu$ m.

**Supplementary Table S1.** Characteristics of TBI, SMCI, AD and control patients.

|         | Case number | Age | Sex | Diagnosis                                                                 | Survival time | Objects       |
|---------|-------------|-----|-----|---------------------------------------------------------------------------|---------------|---------------|
| TBI     | 1           | 48  | M   | RTA TBI                                                                   | 4 h           | Hippocampus   |
|         | 2           | 45  | M   | RTA TBI                                                                   | 6 h           | Hippocampus   |
|         | 3           | 30  | M   | RTA TBI                                                                   | ca. 0.5 day   | Hippocampus   |
|         | 4           | 40  | M   | RTA TBI                                                                   | ca. 0.5 day   | Hippocampus   |
|         | 5           | 20  | M   | RTA TBI                                                                   | ca. 1 day     | Hippocampus   |
|         | 6           | 1   | F   | RTA TBI                                                                   | ca. 1 day     | Hippocampus   |
|         | 7           | 26  | M   | RTA TBI                                                                   | ca. 1 day     | Hippocampus   |
|         | 8           | 35  | M   | RTA TBI                                                                   | ca. 2 day     | Hippocampus   |
|         | 9           | 6   | F   | RTA TBI                                                                   | 4.5 days      | Hippocampus   |
|         | 10          | 65  | F   | RTA TBI                                                                   | 5 days        | Hippocampus   |
|         | 11          | 30  | M   | RTA TBI                                                                   | 9 days        | Hippocampus   |
|         | 12          | 25  | M   | RTA TBI                                                                   | 10 days       | Hippocampus   |
|         | 13          | 58  | M   | RTA TBI                                                                   | 1 month       | Hippocampus   |
| SMCI    | 1           | 43  | M   | SMCI; cirrhosis of liver;<br>5 years military service                     |               | Frontal lobe  |
| AD      | 1           | 57  | M   | AD, Braak stage VI;<br>Motor vehicle accident in<br>2002 and died in 2012 |               | Temporal lobe |
|         | 2           | 69  | M   | AD, Braak stage VI                                                        |               | Temporal lobe |
|         | 3           | 87  | M   | AD, Braak stage IV                                                        |               | Temporal lobe |
|         | 4           | 88  | F   | AD, Braak stage VI                                                        |               | Temporal lobe |
|         | 5           | 86  | F   | AD, Braak stage VI                                                        |               | Temporal lobe |
|         | 6           | 83  | M   | AD, Braak stage VI                                                        |               | Frontal lobe  |
| Control | 1           | 35  | M   | RTA – Skull fracture and<br>the brain came out                            |               | Hippocampus   |
|         | 2           | 30  | F   | Acute leucosis                                                            |               | Hippocampus   |
|         | 3           | 75  | M   | COPD                                                                      |               | Hippocampus   |

RTA = road traffic accident; COPD = Chronic obstructive pulmonary disease.

**Supplementary Table S2.** Reagents and antibodies for immunohistochemistry and immunocytochemistry.

|                    | Product name                 | Dilution | Catalogue number | Supplier                 | Epitope                                     |
|--------------------|------------------------------|----------|------------------|--------------------------|---------------------------------------------|
| Primary antibody   | Rabbit anti-S100A9           | 1/100    | sc-20173         | Santa Cruz Biotechnology | Polyclonal, human S100A9 mapping to 1q21.3  |
|                    | Goat anti-S100A9             | 1/100    | sc-8115          | Santa Cruz Biotechnology | Polyclonal, mouse S100A9 mapping to 3 F1    |
|                    | Mouse anti-S100A8            | 1/50     | MAB4570          | R&D Systems              | Monoclonal, human S100A8 mapping to aa 1-93 |
|                    | Rabbit anti-A11              | 1/500    | –                | Generated by R. Kayed    | Generic amyloid oligomers                   |
|                    | Rabbit anti-OC               | 1/1000   | –                | Generated by R. Kayed    | Generic amyloid fibrils                     |
|                    | Mouse anti-A $\beta$         | 1/100    | ab11132          | Abcam                    | Monoclonal, human A $\beta$ aa 1-17         |
|                    | Mouse 6E10 anti-A $\beta$    | 1/100    | SIG-39320        | Biolegend                | Monoclonal, human A $\beta$ aa 3-8          |
|                    | Mouse anti-CD68              | 1/100    | sc-70761         | Santa Cruz Biotechnology | Monoclonal, human CD68 mapping to 17p13.1   |
|                    | Rabbit anti-NeuN             | 1/500    | ab104225         | Abcam                    | Polyclonal, human NeuN mapping to aa 1-100  |
|                    | Mouse anti-Bax               | 1/100    | sc-7480          | Santa Cruz Biotechnology | Monoclonal, mouse Bax mapping to aa 1-171   |
|                    | Rabbit anti-active caspase-3 | 1/50     | ab2302           | Abcam                    | Polyclonal, human activated caspase-3       |
| Secondary antibody | Anti-rabbit                  | –        | MP-7401          | Vector Laboratories      | –                                           |
|                    | Anti-mouse                   | –        | MP-7402          | Vector Laboratories      | –                                           |
|                    | Anti-goat                    | 1/200    | ab6885           | Abcam                    | –                                           |
|                    | DyLight 488 anti-mouse IgG   | 1/100    | 35502            | Thermo Fisher Scientific | –                                           |
|                    | DyLight 594 anti-mouse IgG   | 1/100    | 35510            | Thermo Fisher Scientific | –                                           |
|                    | AEC peroxidase substrate     |          | SK-4205          | Vector Laboratories      | –                                           |
|                    | AQ aqueous mounting medium   |          | H-5501           | Vector Laboratories      | –                                           |

### Supplementary Table S3. Spearman's rho correlations between immunopositive cell and plaque counts.

Spearman's Rho

|                     | S100A9 (plaques) | A $\beta$ (plaques) | S100A9 | A $\beta$ | S100A9 (microglia) | A11   | BAX   | CASP3 |
|---------------------|------------------|---------------------|--------|-----------|--------------------|-------|-------|-------|
| S100A9 (plaques)    | 1.               | 0.39                | 0.65   | 0.29      | -0.69              | 0.45  | -0.2  | 0.14  |
| A $\beta$ (plaques) | 0.39             | 1.                  | 0.3    | 0.24      | 0.                 | 0.15  | -0.35 | 0.32  |
| S100A9              | 0.65             | 0.3                 | 1.     | 0.49      | -0.78              | 0.73  | 0.26  | 0.25  |
| A $\beta$           | 0.29             | 0.24                | 0.49   | 1.        | -0.32              | 0.62  | 0.61  | 0.54  |
| S100A9 (microglia)  | -0.69            | 0.                  | -0.78  | -0.32     | 1.                 | -0.67 | -0.15 | -0.24 |
| A11                 | 0.45             | 0.15                | 0.73   | 0.62      | -0.67              | 1.    | 0.53  | 0.6   |
| BAX                 | -0.2             | -0.35               | 0.26   | 0.61      | -0.15              | 0.53  | 1.    | 0.24  |
| CASP3               | 0.14             | 0.32                | 0.25   | 0.54      | -0.24              | 0.6   | 0.24  | 1.    |

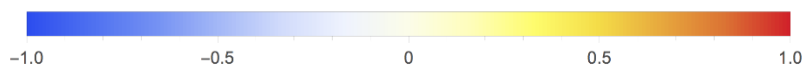

Recalculation of the correlation coefficients for the group of TBI patients without two young individuals does not affect significantly the values of these coefficients.

## Supplementary Methods

### Preparation of S100A9 amyloid fibrils

Freeze-dried S100A9 protein was dissolved in PBS buffer at pH 7.4. The solution was filtered through a spin 0.2  $\mu$ m membrane filter to remove any aggregated species. Fibrils were prepared by incubating S100A9 solution (final concentration of 400  $\mu$ M) in PBS buffer, pH 7.4, at 50  $^{\circ}$ C in 500  $\mu$ l reaction volume on a rotating shaker (300 rpm) during 3 days. Fibril morphology was confirmed by AFM.

### Thioflavin-T kinetics assays

A $\beta$ <sub>42</sub> (Tocris Bioscience) was freshly dissolved and filtered through a spin 0.2  $\mu$ m membrane filter to remove aggregated species. 30  $\mu$ M A $\beta$ <sub>42</sub> in PBS buffer, pH 7.4, was incubated alone and in the presence of S100A9 fibrillar samples taken at 6 and 30  $\mu$ M concentrations in a 96-well plate mixed with 20  $\mu$ M thioflavin-T at 42 $^{\circ}$ C. The resulting fluorescence was measured each 10 minutes during 13 hours using a fluorescence plate reader (Infinite F200 pro, TECAN) in triplicate samples. Excitation and emission wavelengths were set at 430 nm and 485 nm, respectively.
